# Supplementary material for: A global 5 km monthly potential evapotranspiration dataset (1982–2015) estimated by the Shuttleworth–Wallace model
Source: Copernicus journal article supplement (doi:10.5194/essd-15-4849-2023), 2023-10-31
Supplement: Supplementary file 1 [file essd-15-4849-2023-supplement.pdf]

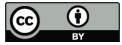

*Supplement of*

**A global 5 km monthly potential evapotranspiration dataset (1982–2015)  
estimated by the Shuttleworth–Wallace model**

**Shanlei Sun et al.**

*Correspondence to:* Shanlei Sun ([sun.s@nuist.edu.cn](mailto:sun.s@nuist.edu.cn))

The copyright of individual parts of the supplement might differ from the article licence.

## S1. Computation for net radiation ( $R_n$ )

### S1.1. The MSWX-Past $R_n$

For comprehensively utilizing radiation variables [e.g., downward shortwave radiation ( $R_{ds}$ , W/m<sup>2</sup>), and downward longwave radiation ( $R_{dl}$ , W/m<sup>2</sup>)], the MSWX-Past  $R_n$  (W/m<sup>2</sup>) can be expressed as:

$$\begin{cases} R_n = (1 - \alpha)R_{ds} + R_{nl} & (S1a) \\ \alpha = \alpha_m - (\alpha_m - \alpha_s) \exp(-0.56LAI) & (S1b) \\ R_{nl} = \varepsilon R_{dl} - \varepsilon \frac{5.67}{100000000} (T_{mean} + 273.16)^4 & (S1c) \end{cases}$$

where  $\alpha$  is land surface albedo (unitless), which is related to the albedo of the “closed” canopy (i.e.,  $\alpha_m$ , unitless) and the bare soil ( $\alpha_s$ , unitless; Uchijima, 1976);  $R_{nl}$  is net longwave radiation (W/m<sup>2</sup>);  $T_{mean}$  is mean air temperature at 2 m height (°C);  $\varepsilon$  denotes land surface emissivity (unitless). Considering the major focus of PET in this study,  $\alpha_s$  is set to 0.1 to represent the albedo of the wet bare soil (Shuttleworth, 1993).  $\alpha_m$  is collected from the literature and varies among land use/land cover (LULC) types (Table S1; Zhou et al., 2006).

### S1.2. The ERA5 and MERRA-2 $R_n$

The ERA5 and MERRA-2 provide net shortwave radiation ( $R_{ns}$ , W/m<sup>2</sup>) and  $R_{nl}$ , and therefore the corresponding  $R_n$  can be obtained using the equation below:

$$R_n = R_{ns} + R_{nl} \quad (S2)$$

### S1.3. The CRU TS4.06 $R_n$

Due to lack of  $R_{ds}$  within the CRU TS4.06, the CERES satellite-based  $R_{ds}$  will be used to estimate the 1982–2015  $R_{ds}$  time series based on the physical relationship between  $R_{ds}$  and cloud cover ( $Cld$ , unitless). In this study, the cloud-based  $R_{ds}$  algorithm of Reddy (1974) is used, and the major equations and the detailed procedures are shown below.

$$R_{ds} = [a_s + b_s(1 - Cld)]R_e \quad (S3a)$$

$$R_e = \frac{1666.67}{\pi} G_{sc} d_r [\omega_s \sin(\phi) \sin(\delta) + \cos(\phi) \cos(\delta) \sin(\omega_s)] \quad (S3b)$$

$$d_r = 1 + 0.033 \cos\left(\frac{2\pi}{365} J\right) \quad (S3c)$$

$$\delta = 0.0409 \sin\left(\frac{2\pi}{365} J - 1.39\right) \quad (S3d)$$

$$R_{nl} = \sigma \frac{T_{min,K}^4 + T_{max,K}^4}{2} [0.34 - 0.14\sqrt{ea}] \left(1.35 \frac{R_{ds}}{R_{s0}} - 0.35\right) \quad (S3e)$$

$$R_{s0} = (a_s + b_s)R_e \quad (S3f)$$

where  $R_e$  (W/m<sup>2</sup>) and  $G_{sc}$  (= 1366.67 W/m<sup>2</sup>) are extraterrestrial radiation and solar constant, respectively;  $d_r$  denotes inverse relative distance Earth-Sun;  $\omega_s$  (rad),  $\phi$  (rad) and  $\delta$  (rad) denotes sunset hour angle, latitude and solar declination of a given weather site, respectively;  $J$  represents the number of the day in the year between 1 (i.e., 1 January) and 365 or 366 (i.e., 31 December);  $a_s$  is regression constant, expressing the fraction of  $R_e$  reaching the Earth on overcast days (i.e.,  $Cld=1$ ); and  $a_s+b_s$

represents fraction of  $R_e$  reaching the earth on clear days (i.e.,  $Cld=0$ );  $\sigma$  is Stefan-Boltzmann constant;  $T_{max,K}$  (K) and  $T_{min,K}$  (K) denote maximum and minimum absolute temperature, respectively.

Despite that the reference values for  $a_s$  (=0.25) and  $b_s$  (=0.50) are given in Allen et al. (1998), their spatio-temporal differences may impact the accuracy of the estimated  $R_{ds}$ . Thus, we firstly resampled the CERES  $R_{ds}$  into  $0.5^\circ \times 0.5^\circ$  for meeting the CRU TS4.06  $Cld$  resolution, and used the linear regression to fit  $a_s$  and  $b_s$  of EQ. S6a in each month at each CRU TS4.06 grid with the CERES  $R_{ds}$  and the  $Cld$  in 2001–2015 and the least square method. Subsequently, these coefficients were employed to calculate monthly  $R_{ds}$  at each grid during 1982–2015 based on the CRU  $Cld$  data. In this study, we would like to follow the computation procedures from Allen et al. (1998) to calculate  $R_{nl}$  (i.e. EQs. S6e and S6f). At last,  $R_n$  can be calculated based on EQ. S4a.

## S2. Computation for vapour deficit pressure (*D*)

### S2.1. The MSWX-Past *D*

$$\left\{ \begin{array}{l} e_s = \frac{0.6108 \exp\left(\frac{17.27T_{max}}{237.3 + T_{max}}\right) + 0.6108 \exp\left(\frac{17.27T_{min}}{237.3 + T_{min}}\right)}{2} \\ D = e_s(1 - Rh) \end{array} \right. \quad \begin{array}{l} (S4a) \\ (S4b) \end{array}$$

where  $e_s$  is the saturated vapour pressure (kPa);  $Rh$  is the relative humidity (%);  $T_{min}$  and  $T_{max}$  is the minimum and maximum air temperatures (°C).

### S2.2. The CRU TS4.06 *D*

$$D = e_s - e_a \quad (S5)$$

where  $e_s$  is estimated based on EQ. S4a and the CRU TS4.06 minimum and maximum air temperatures;  $e_a$  is the actual vapour pressure (kPa).

### S2.3. The ERA-5 *D*

$$D = e_s - 0.6108 \exp\left(\frac{17.27d_{2m}}{237.3 + d_{2m}}\right) \quad (S6)$$

where  $e_s$  is estimated based on EQ. S7a and the ERA-5 minimum and maximum air temperatures;  $d_{2m}$  is the dewpoint temperature (°C).

### S2.4. The MERRA-2 *D*

$$D = e_s - Pres \frac{Sh}{0.622} \quad (S7)$$

where  $e_s$  is estimated based on EQ. S7a and the MERRA-2 minimum and maximum air temperatures;  $Pres$  is the atmospheric pressure (kPa);  $Sh$  is the specific humidity (kg/kg).

### S3. Computation for soil heat flux ( $G$ )

The soil heat flux ( $G$ ,  $\text{W/m}^2$ ) is computed according to the equation of Allen et al. (1998):

$$G = 0.81(T_{mean,+1} - T_{mean,-1}) \quad (\text{S8})$$

where  $T_{mean,-1}$  and  $T_{mean,+1}$  are the mean air temperatures in pervious and next months ( $^{\circ}\text{C}$ ), respectively.

#### S4. Computations for aerodynamic resistance ( $r_a^a$ ) and soil boundary layer resistance ( $r_a^s$ )

In this study, the formulation of Shuttleworth and Gurney (1990) is used to compute  $r_a^a$  and  $r_a^s$ . Their equations are shown as:

$$\left\{ r_a^a = \frac{1}{ku_*} \ln\left(\frac{z_a - d_0}{h - d_0}\right) + \frac{h}{nK_h} \left\{ \exp\left[n \frac{1 - (Z_0 + d_p)}{h}\right] - 1 \right\} \right. \quad (S9a)$$

$$\left. r_a^s = \frac{h \exp(n)}{nK_h} \times \left\{ \exp\left(-\frac{nz_{0g}}{h}\right) - \exp\left[-\frac{n(Z_0 + d_p)}{h}\right] \right\} \right\} \quad (S9b)$$

where  $h$  is the vegetation height (m);  $n$  is the eddy diffusivity decay constant of the vegetation (unitless);  $K_h$  is the eddy diffusion coefficient at the top of canopy ( $\text{m}^2/\text{s}$ );  $z_{0g}$  indicates the roughness length of ground (m), and varies with the vegetation type (Table S1);  $Z_0$  is the “preferred” roughness length (m), equaling to  $0.13h$ ;  $d_p$  denotes the “preferred” zero plane displacement (m), and is set to  $0.63h$ ;  $k$  ( $= 0.41$ ) is von Karman’s constant;  $u_*$  is the friction velocity (m/s);  $z_a$  is the reference height (m) and equals to  $2+h$ ;  $d_0$  is the zero plane displacement of canopy (m). All terms within EQ. S1 are parameterized according to Monteith (1973), Choudhury and Monteith (1988), Shuttleworth and Gurney (1990), Federer et al. (1996), and Allen et al. (1998), such as,

$$K_h = ku_*(h - d_0) \quad (S10a)$$

$$u_* = ku_a / \ln\left[\frac{z_a - d_0}{z_0}\right] \quad (S10b)$$

$$u_a = u_m \frac{\ln(67.8z_a - 5.42)}{\ln(67.8h_m - 5.42)} \quad (S10c)$$

$$d_0 = \begin{cases} h - z_{0c}/0.3, & \text{(Closed canopy: LAI} \geq 4) \\ 1.1h \ln[1 + (c_d \text{LAI})^{0.25}], & \text{(Sparse growing vegetation: LAI} < 4) \end{cases} \quad (S10d)$$

$$z_0 = \min [0.3(h - d_0), z_{0g} + 0.3h(c_d \text{LAI})^{0.5}] \quad (S10e)$$

$$z_{0c} = \begin{cases} 0.13h, & \text{Short vegetation: } h \leq 1 \\ 0.05h, & \text{Tall vegetation: } h \geq 10 \\ 0.139h - 0.009h^2, & \text{Others: } 1 < h < 10 \end{cases} \quad (S10f)$$

$$c_d = \begin{cases} 1.4 \times 10^{-3}, & h = 0 \\ [-1 + \exp(0.909 - 3.03z_{0c}/h)]^4/4, & h > 0 \end{cases} \quad (S10g)$$

$$n = \begin{cases} 2.5, & \text{Short vegetation: } h \leq 1 \\ 4.25, & \text{Tall vegetation: } h \geq 10 \\ 2.306 + 0.194h, & \text{Others: } 1 < h < 10 \end{cases} \quad (S10h)$$

where  $u_a$  and  $u_m$  represent the wind speed at the reference height and the height of measurement above ground surface, respectively (m/s);  $h_m$  is the height of measurement above ground surface (m);  $z_0$  is the roughness length of canopy (m), however  $z_{0c}$  is that for a “closed” canopy (m);  $c_d$  is the mean drag coefficient for individual leaves (unitless).

## S5. Computation for vegetation boundary layer resistance ( $r_a^c$ )

According to Shuttleworth and Wallace (1985), Shuttleworth and Gurney (1990), and Brisson et al. (1998), all leaf boundary layers are in parallel and then the  $r_a^c$  can be expressed as:

$$r_a^c = \frac{\left(\frac{100}{n}\right) \left(\frac{w}{u_h}\right)^{\frac{1}{2}} \left[1 - \exp\left(-\frac{n}{2}\right)\right]^{-1}}{2LAI} \quad (\text{S11a})$$

$$w = \begin{cases} w_{max}, & \text{for perennial vegetation} \\ w_{max}[1 - \exp(-0.6LAI)] & \text{for annual vegetation} \end{cases} \quad (\text{S11b})$$

where  $w$  denotes canopy characteristic leaf width (m), while  $w_{max}$  is maximum vegetation leaf width (m; Table S1);  $u_h$  is the wind speed at the top of canopy (m/s).

## S6. Computation for soil surface resistance ( $r_s^s$ )

In this study, the parameter of  $r_s^s$  is estimated based on Villagarcía et al. (2010), and can be written as:

$$r_s^s = x\theta_{sat}^y \quad (S12)$$

where  $\theta_{sat}$  is saturated water content in soil ( $\text{cm}^3/\text{cm}^3$ ), while  $x$  and  $y$  are the fitting coefficients for this equation. Considering differences in  $r_s^s$  under different vegetation coverage conditions, the coefficients of  $x$  ( $y$ ) are set to 111.86 (-0.58) for plant position but 36.821 (-1.42) for bare soil position. The global  $\theta_{sat}$  at the first soil layer (i.e., 0–0.0451 m) is used here, and collected from <http://globalchange.bnu.edu.cn/research/soil5.jsp> (Dai et al., 2019a, 2019b).



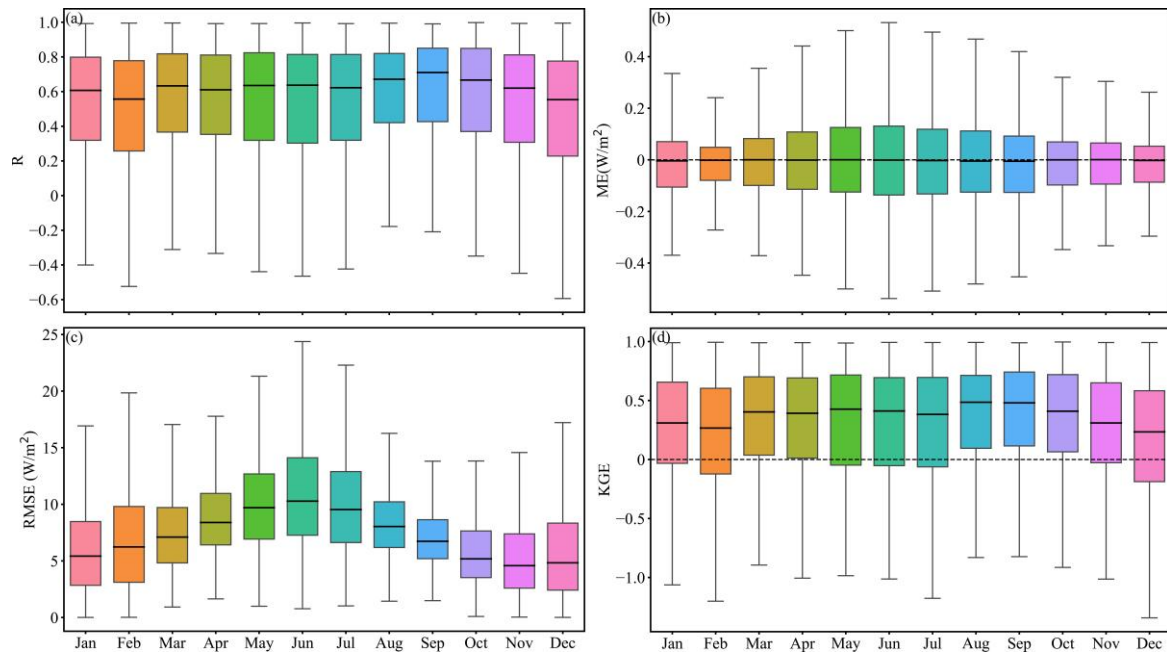

**Figure S1: Monthly validation result for net shortwave radiation estimated based on the CERES satellite-based observations and the CRU TS4.06 cloud cover data. The outer edges of the boxes and the horizontal lines within the boxes indicate the 25th, 75th, and 50th percentiles of the validation metrics.**

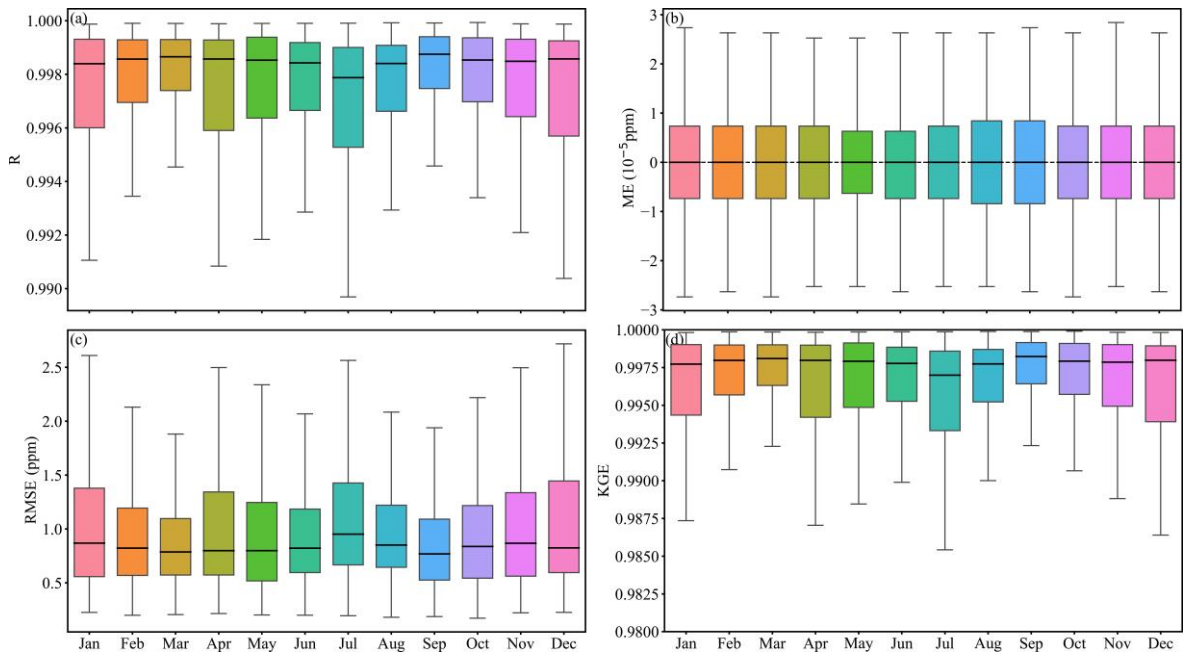

**Figure S2: Monthly validation result for CO<sub>2</sub> concentration estimated based on the Global CO<sub>2</sub> Distribution product from Japan Meteorological Agency. The outer edges of the boxes and the horizontal lines within the boxes indicate the 25th, 75th, and 50th percentiles of the validation metrics.**

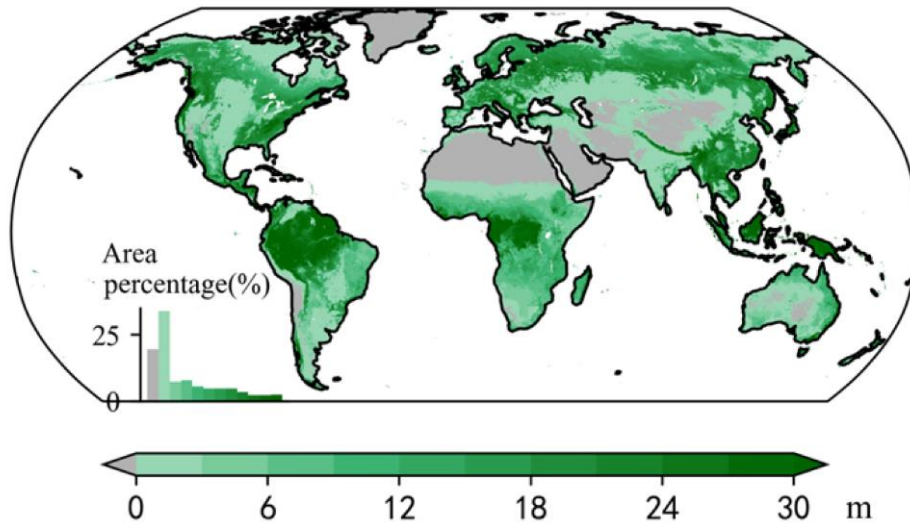

Figure S3: Spatial distribution of the reconstructed canopy height in 1982 across the globe.

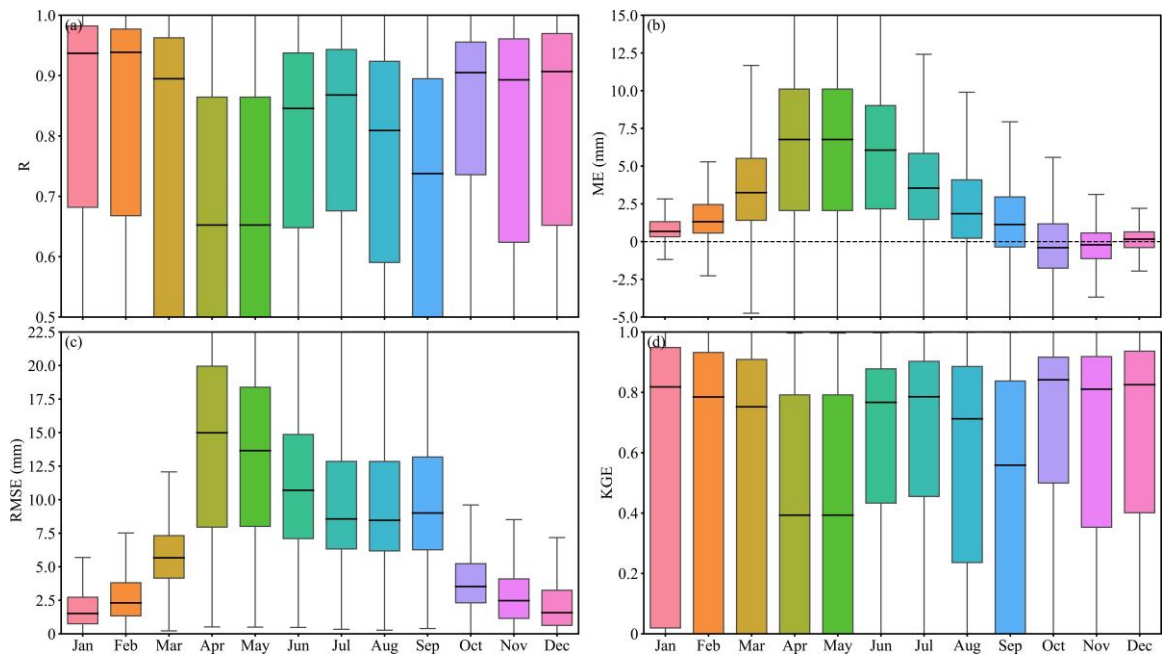

**Figure S4: Comparison of the monthly PET estimates based on the daily and monthly meteorological variables. The outer edges of the boxes and the horizontal lines within the boxes indicate the 25th, 75th, and 50th percentiles of the validation metrics.**

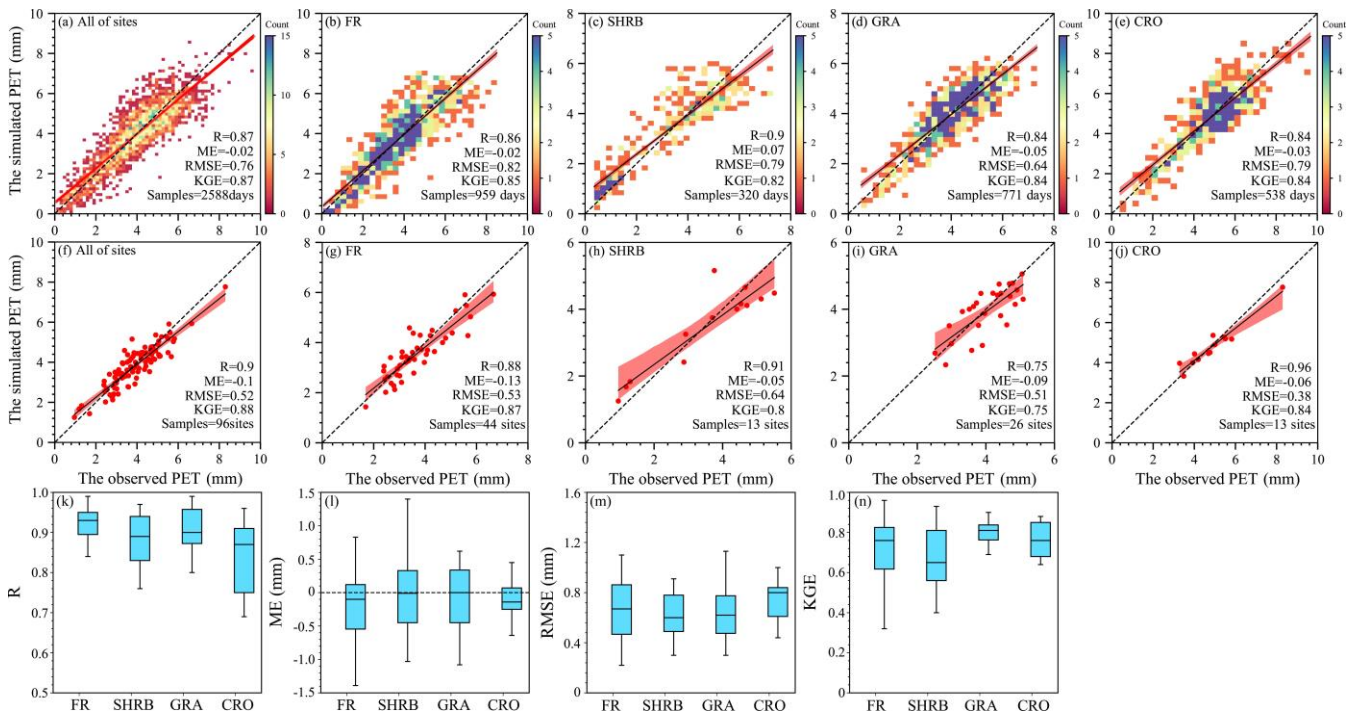

**Figure S5: Validation results for the calibrated SW model by the observations at all of 96 sites. (a): Comparison for daily PET at all of 96 sites. (b-e): Comparison for daily PET for each LULC. (f): Comparison for site mean PET at all of 96 sites. (g-j): Comparison site mean PET for each LULC. (k-n) Boxplots of the validation metrics of daily PET simulations for each LULC. The whiskers represent the minimum and maximum values of the model performance metrics. The outer edges of the boxes and the horizontal lines within the boxes indicate the 25th, 75th, and 50th percentiles of the validation metrics.**

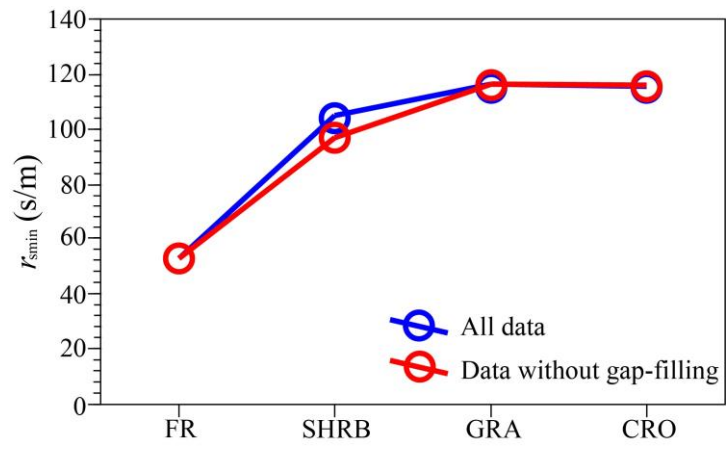

**Figure S6: The calibrated  $r_{min}$  based on all data and data without gap-filling.**

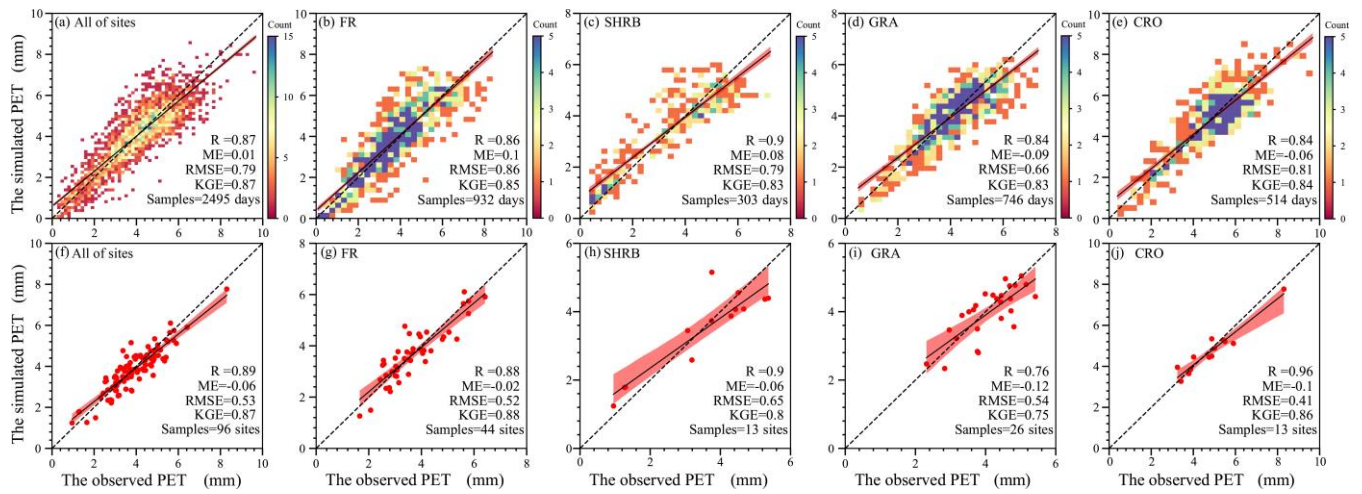

**Figure S7: Validation results for the SW model calibrated using the data points without gap-filling. (a): Comparison for daily PET at all of 96 sites. (b-e): Comparison for daily PET for each LULC. (f): Comparison for site mean PET at all of 96 sites. (g-j): Comparison site mean PET for each LULC.**

**Table S1: Some typical PET models**

| Proposed by                                               | Equation                                                                                                    | Timescale            |
|-----------------------------------------------------------|-------------------------------------------------------------------------------------------------------------|----------------------|
| Dalton (1802) <sup>a</sup>                                | $PET = (0.3648 + 0.07223u)(e_s - e_a)$                                                                      | Monthly              |
| Thornthwaite (1948) <sup>b</sup>                          | $PET = 16N_m(10T_{mean})$                                                                                   | Monthly              |
| Turc (1961) <sup>c</sup>                                  | $PET = 0.013[N_{mean}/(T_{mean} + 15)](R_n + 50)$                                                           | Daily/Monthly        |
| Hargreaves and Samani (1985) <sup>c</sup>                 | $PET = 0.0145K_{RS}R_e(T_a + 17.8)T_d^{0.5}$                                                                | Daily/Monthly/Yearly |
| Penman (1948) <sup>d</sup>                                | $PET = \frac{\Delta H + \gamma(e_s - e_a)f(u)}{\Delta + \gamma}$                                            | Daily                |
| Monteith (1965) <sup>d</sup>                              | $PET = \frac{\Delta(R_n - G) + [\rho c_p(e_s - e_a)]/r_a}{\Delta + \gamma(1 + r_s/r_a)}$                    | Daily                |
| Allen et al. (1998) (FAO-56 Penman-Monteith) <sup>d</sup> | $PET = \frac{0.408\Delta(R_n - G) + \gamma u(e_s - e_a)[900/(T_{mean} + 273)]}{\Delta + \gamma(1 + 0.34u)}$ | Hourly/Daily/Monthly |

Note: <sup>a</sup>, <sup>b</sup>, <sup>c</sup> and <sup>d</sup> represent mass-transfer-based, temperature-based, radiation-based, and combination PET models, respectively.  $T_d$  is differences in the maximum ( $T_{max}$ ) and the minimum ( $T_{min}$ ) temperatures, i.e.,  $T_d = T_{max} - T_{min}$ .  $K_{RS}$  is empirical coefficient fitted to  $R_{ds}/R_e$  versus  $T_d$  data.  $f(u)$  is a function of wind speed.  $r_s$  represents surface or canopy resistance, while  $r_a$  represents aerodynamic resistance.



**Table S2: Basic information of the used 96 EC sites for calibrating the SW model in this study**

| IGBP type           | LULC Names            | Latitude (°) | Logtitude (°) | Altitude (m) | Country         | Date                | Unstressed days |
|---------------------|-----------------------|--------------|---------------|--------------|-----------------|---------------------|-----------------|
|                     | US-SP1 <sup>a</sup>   | 29.74        | -82.22        | 50           | USA             | 2005/1/1—12/31      | 8               |
|                     | US-SP2 <sup>a</sup>   | 29.76        | -82.24        | 50           | USA             | 2000/1/1—2004/12/31 | 36              |
|                     | CA-Qcu <sup>a</sup>   | 49.27        | -74.04        | 392          | Canada          | 2002/1/1—2006/12/31 | 10              |
|                     | DE-Bay <sup>a</sup>   | 50.14        | 11.87         | /            | Germany         | 1997/1/1—1999/12/31 | 11              |
|                     | DE-Lkb <sup>b,e</sup> | 49.10        | 13.30         | 1308         | Germany         | 2009/1/1—2013/12/31 | 8               |
|                     | CA-SF2 <sup>b,e</sup> | 54.25        | -105.88       | 536          | Canada          | 2001/1/1—2005/12/31 | 13              |
|                     | CA-SF1 <sup>b,e</sup> | 54.49        | -105.82       | 520          | Canada          | 2003/1/1—2006/12/31 | 13              |
|                     | FI-Hyy <sup>b,e</sup> | 61.85        | 24.29         | 181          | Finland         | 1996/1/1—2014/12/31 | 11              |
|                     | IT-SRo <sup>b,e</sup> | 43.73        | 10.28         | 6            | Italy           | 1999/1/1—2012/12/31 | 18              |
| Evergreen           | IT-Ren <sup>b,e</sup> | 46.59        | 11.43         | 1730         | Italy           | 1998/1/1—2013/12/31 | 14              |
| Needle Forest (ENF) | DE-Obe <sup>b,e</sup> | 50.79        | 13.72         | 735          | Germany         | 2008/1/1—2014/12/31 | 13              |
|                     | CA-TP1 <sup>b,e</sup> | 42.66        | -80.56        | 265          | Canada          | 2002/1/1—2014/12/31 | 27              |
|                     | CA-Qfo <sup>b,e</sup> | 49.69        | -74.34        | 382          | Canada          | 2003/1/1—2010/12/31 | 18              |
|                     | RU-Fyo <sup>b,e</sup> | 56.46        | 32.92         | 265          | Russia          | 1998/1/1—2014/12/31 | 16              |
|                     | IT-Lav <sup>b,e</sup> | 45.96        | 11.28         | 1353         | Italy           | 2003/1/1—2014/12/31 | 31              |
|                     | US-Blo <sup>b,e</sup> | 38.90        | -120.63       | 1315         | USA             | 1997/1/1—2007/12/31 | 46              |
|                     | NL-Loo <sup>b,e</sup> | 52.17        | 5.74          | 25           | The Netherlands | 1996/1/1—2014/12/31 | 38              |
|                     | DE-Tha <sup>b,e</sup> | 50.96        | 13.57         | 380          | Germany         | 1996/1/1—2014/12/31 | 52              |
|                     | US-Me2 <sup>b,e</sup> | 44.45        | -121.56       | 1253         | USA             | 2002/1/1—2014/12/31 | 43              |
|                     | US-NR1 <sup>b,e</sup> | 40.03        | -105.55       | 3050         | USA             | 1998/1/1—2014/12/31 | 79              |
|                     | AU-Cow <sup>c</sup>   | -16.24       | 145.43        | 86           | Australia       | 2010/1/1—2015/12/31 | 17              |
|                     | AU-Ctr <sup>c</sup>   | -16.10       | 145.45        | 66           | Australia       | 2010/1/1—2017/12/31 | 8               |
| Evergreen           | US-SP3 <sup>a</sup>   | 29.75        | -82.16        | 50           | USA             | 1999/1/1—2004/12/31 | 23              |
| Broadleaf           | AU-Rob <sup>b,e</sup> | -17.12       | 145.63        | 710          | Australia       | 2014/1/1—12/31      | 9               |
| Forest (EBF)        | BR-Sa3 <sup>b,e</sup> | -3.02        | -54.97        | 100          | Brazil          | 2000/1/1—2004/12/31 | 13              |
|                     | AU-Wom <sup>b,e</sup> | -37.42       | 144.09        | 705          | Australia       | 2010/1/1—2014/12/31 | 15              |
|                     | FR-Pue <sup>b,e</sup> | 43.74        | 3.60          | 270          | France          | 2000/1/1—2014/12/31 | 37              |

|                        |                       |        |         |      |           |                                             |    |
|------------------------|-----------------------|--------|---------|------|-----------|---------------------------------------------|----|
|                        | AU-Tum <sup>b,e</sup> | -35.66 | 148.15  | 1200 | Australia | 2001/1/1—2014/12/31                         | 46 |
| Deciduous              | FHK <sup>d,e</sup>    | 35.44  | 138.76  | 1100 | Japan     | 2006/1/1—2013/12/31                         | 17 |
| Needle Forest<br>(DNF) | TMK <sup>d,e,f</sup>  | 42.74  | 141.52  | 140  | Japan     | 2001/1/1—2004/12/31                         | 13 |
|                        | AU-Lox <sup>b,e</sup> | -34.47 | 140.66  | /    | Australia | 2008/1/1—2009/12/31                         | 11 |
|                        | IT-PT1 <sup>b,e</sup> | 45.20  | 9.06    | 60   | Italy     | 2002/1/1—2004/12/31                         | 12 |
|                        | CA-TPD <sup>b,e</sup> | 42.64  | -80.56  | 260  | Canada    | 2012/1/1—2014/12/31                         | 12 |
| Deciduous              | DK-Sol <sup>b,e</sup> | 55.49  | 11.64   | 40   | Denmark   | 1996/1/1—2014/12/31                         | 10 |
| Broadleaf              | IT-Ro2 <sup>b,e</sup> | 42.39  | 11.92   | 160  | Italy     | 2002/1/1—2012/12/31                         | 20 |
| Forest (DBF)           | IT-Col <sup>b,e</sup> | 41.85  | 13.59   | 1560 | Italy     | 1996/1/1—2014/12/31                         | 16 |
|                        | DE-Hai <sup>b,e</sup> | 51.08  | 10.45   | 430  | Germany   | 2000/1/1—2012/12/31                         | 27 |
|                        | US-MOz <sup>a</sup>   | 38.74  | -92.20  | 219  | USA       | 2005/1/1—2006/12/31                         | 13 |
|                        | FR-Hes <sup>a</sup>   | 48.67  | 7.07    | /    | France    | 1997/1/1—2006/12/31                         | 39 |
|                        | US-Syv <sup>b,e</sup> | 46.24  | -89.35  | 540  | USA       | 2001/1/1—2014/12/31                         | 21 |
|                        | CA-Gro <sup>b,e</sup> | 48.22  | -82.16  | 340  | Canada    | 2003/1/1—2014/12/31                         | 21 |
| Mixed Forest<br>(MF)   | BE-Vie <sup>b,e</sup> | 50.30  | 6.00    | 493  | Belgium   | 1996/1/1—2014/12/31                         | 17 |
|                        | TSE <sup>d,e</sup>    | 45.06  | 142.11  | 70   | Japan     | 2001/8/1—2002/12/31;<br>2004/1/1—2012/12/31 | 27 |
|                        | GDK <sup>d,e</sup>    | 37.75  | 127.15  | 252  | Korea     | 2004/1/1—2008/12/31                         | 10 |
| Closed                 | US-KS2 <sup>b,e</sup> | 28.61  | -80.67  | 3    | USA       | 2003/1/1—2006/12/31                         | 18 |
| Shrubland<br>(CSH)     | IT-Noe <sup>b,e</sup> | 40.61  | 8.15    | 25   | Italy     | 2004/1/1—2014/12/31                         | 25 |
| Open                   | CA-SF3 <sup>b,e</sup> | 54.09  | -106.01 | 540  | Canada    | 2001/1/1—2006/12/31                         | 17 |
| Shrubland<br>(OSH)     | ES-Amo <sup>b,e</sup> | 36.83  | -2.25   | 1200 | Espain    | 2007/1/1—2012/12/31                         | 34 |
| Woody                  | AU-RDF <sup>b,e</sup> | -14.56 | 132.48  | 171  | Australia | 2011/1/1—2013/12/31                         | 15 |
| Savannah<br>(WSA)      | US-Ton <sup>b,e</sup> | 38.43  | -120.97 | 177  | USA       | 2001/1/1—2014/12/31                         | 57 |
| Savannah<br>(SAV)      | BW-Ma1 <sup>a</sup>   | -19.92 | 23.56   | ~930 | Botswana  | 2000/1/1—12/31                              | 13 |
|                        | ES-LMa <sup>a</sup>   | 39.94  | -5.77   | 265  | Spain     | 2004/1/1—2006/12/31                         | 9  |
|                        | SD-Dem <sup>b,e</sup> | 13.28  | 30.48   | 500  | Sudan     | 2005/1/1—2009/12/31                         | 16 |

|                    |                       |                     |         |        |           |                     |                     |    |
|--------------------|-----------------------|---------------------|---------|--------|-----------|---------------------|---------------------|----|
|                    | AU-Dry <sup>b,e</sup> | -15.26              | 132.37  | 180    | Australia | 2008/1/1—2014/12/31 | 20                  |    |
|                    | AU-DaS <sup>b,e</sup> | -14.16              | 131.39  | 53     | Australia | 2008/1/1—2014/12/31 | 29                  |    |
|                    | AU-Cpr <sup>b,e</sup> | -34.00              | 140.59  | 53     | Australia | 2010/1/1—2014/12/31 | 36                  |    |
|                    | AU-Sam <sup>c</sup>   | -27.39              | 152.88  | 87     | Australia | 2011/1/1—2017/12/31 | 45                  |    |
|                    | US-Aud <sup>a</sup>   | 31.59               | -110.51 | 1469   | USA       | 2003/1/1—2005/12/31 | 24                  |    |
|                    | PT-Mi2 <sup>a</sup>   | 38.48               | -8.02   | ~240   | Portugal  | 2005/1/1—2006/12/31 | 9                   |    |
|                    | ES-VDA <sup>a</sup>   | 42.15               | 1.45    | /      | Spain     | 2004/1/1—2004/12/31 | 10                  |    |
|                    | HU-Bug <sup>a</sup>   | 46.69               | 19.60   | /      | Hungary   | 2003/1/1—2006/12/31 | 12                  |    |
|                    | US-FPe <sup>a</sup>   | 48.31               | -105.10 | 634    | USA       | 2000/1/1—2006/12/31 | 30                  |    |
|                    | CN-Du2 <sup>b,e</sup> | 42.05               | 116.28  | /      | China     | 2006/1/1—2008/12/31 | 12                  |    |
|                    | CN-Du3 <sup>b,e</sup> | 42.06               | 116.28  | /      | China     | 2009/1/1—2010/12/31 | 12                  |    |
|                    | RU-Ha1 <sup>b,e</sup> | 54.73               | 90.00   | 446    | Russia    | 2002/1/1—2004/12/31 | 13                  |    |
|                    | US-ARb <sup>b,e</sup> | 35.55               | -98.04  | 424    | USA       | 2005/1/1—2006/12/31 | 16                  |    |
|                    | US-ARc <sup>b,e</sup> | 35.55               | -98.04  | 424    | USA       | 2005/1/1—2006/12/31 | 16                  |    |
|                    | CN-HaM <sup>b,e</sup> | 37.37               | 101.18  | /      | China     | 2002/1/1—2004/12/31 | 15                  |    |
|                    | IT-Tor <sup>b,e</sup> | 45.84               | 7.58    | 2160   | Italy     | 2008/1/1—2014/12/31 | 23                  |    |
| Grassland<br>(GRA) | US-LWW <sup>b,e</sup> | 34.96               | -97.98  | 365    | USA       | 1997/1/1—1998/12/31 | 19                  |    |
|                    | AT-Neu <sup>b,e</sup> | 47.12               | 11.32   | 970    | Austria   | 2002/1/1—2012/12/31 | 13                  |    |
|                    | AU-TTE <sup>b,e</sup> | -22.29              | 133.64  | 553    | Australia | 2012/1/1—2014/12/31 | 18                  |    |
|                    | AU-Rig <sup>b,e</sup> | -36.65              | 145.58  | 162    | Australia | 2011/1/1—2014/12/31 | 17                  |    |
|                    | AU-Emr <sup>b,e</sup> | -23.86              | 148.47  | /      | Australia | 2011/1/1—2013/12/31 | 23                  |    |
|                    | US-AR2 <sup>b,e</sup> | 36.64               | -99.60  | 646    | USA       | 2009/1/1—2012/12/31 | 27                  |    |
|                    | CN-Cng <sup>b,e</sup> | 44.59               | 123.51  | /      | China     | 2007/1/1—2010/12/31 | 20                  |    |
|                    | US-Goo <sup>b,e</sup> | 34.25               | -89.87  | 87     | USA       | 2002/1/1—2006/12/31 | 32                  |    |
|                    | US-AR1 <sup>b,e</sup> | 36.43               | -99.42  | 611    | USA       | 2009/1/1—2012/12/31 | 31                  |    |
|                    | DE-Gri <sup>b,e</sup> | 50.95               | 13.51   | 385    | Germany   | 2004/1/1—2014/12/31 | 37                  |    |
|                    | AU-Stp <sup>b,e</sup> | -17.15              | 133.35  | 225    | Australia | 2008/1/1—2014/12/31 | 39                  |    |
|                    | US-SRG <sup>b,e</sup> | 31.79               | -110.83 | 1291   | USA       | 2008/1/1—2014/12/31 | 70                  |    |
|                    | US-Wkg <sup>b,e</sup> | 31.74               | -109.94 | 1531   | USA       | 2004/1/1—2014/12/31 | 80                  |    |
|                    | US-Var <sup>b,e</sup> | 38.41               | -120.95 | 129    | USA       | 2000/1/1—2014/12/31 | 126                 |    |
|                    | Cropland              | US-Bo1 <sup>a</sup> | 40.01   | -88.29 | 219       | USA                 | 1997/1/1—2006/12/31 | 65 |

|       |                       |       |         |     |         |                     |    |
|-------|-----------------------|-------|---------|-----|---------|---------------------|----|
| (CRO) | IT-CA2 <sup>b,e</sup> | 42.38 | 12.03   | 200 | Italy   | 2011/1/1—2014/12/31 | 11 |
|       | US-CRT <sup>b,e</sup> | 41.63 | -83.35  | 180 | USA     | 2011/1/1—2013/12/31 | 13 |
|       | US-Twt <sup>b,e</sup> | 38.11 | -121.65 | -7  | USA     | 2009/1/1—2014/12/31 | 10 |
|       | BE-Lon <sup>b,e</sup> | 50.55 | 4.75    | 167 | Belgium | 2004/1/1—2014/12/31 | 13 |
|       | DE-Kli <sup>b,e</sup> | 50.89 | 13.52   | 478 | Germany | 2004/1/1—2014/12/31 | 19 |
|       | FR-Gri <sup>b,e</sup> | 48.84 | 1.95    | 125 | France  | 2004/1/1—2014/12/31 | 9  |
|       | US-ARM <sup>b,e</sup> | 36.61 | -97.49  | 314 | USA     | 2003/1/1—2012/12/31 | 46 |
|       | DE-Geb <sup>b,e</sup> | 51.10 | 10.91   | 162 | Germany | 2001/1/1—2014/12/31 | 56 |
|       | US-Ne1 <sup>b,e</sup> | 41.17 | -96.48  | 361 | USA     | 2001/1/1—2013/12/31 | 87 |
|       | US-Ne2 <sup>b,e</sup> | 41.16 | -96.47  | 362 | USA     | 2001/1/1—2013/12/31 | 95 |
|       | US-Ne3 <sup>b,e</sup> | 41.18 | -96.44  | 363 | USA     | 2001/1/1—2013/12/31 | 92 |
|       | MSE <sup>d,e</sup>    | 36.05 | 140.03  | 13  | Japan   | 2001/1/1—2006/12/31 | 22 |

Note: <sup>a</sup>, <sup>b</sup>, <sup>c</sup> and <sup>d</sup> represent that the sites are from LaThuile (<https://fluxnet.org/data/la-thuile-dataset/>), FLUXNET2015 Tier-2 (<http://fluxnet.fluxdata.org/data/fluxnet2015-dataset/>), OzFlux (<https://data.ozflux.org.au/portal/home.jsp>), and AsiaFlux ([http://asiaflux.net/?page\\_id=23](http://asiaflux.net/?page_id=23)), respectively. <sup>e</sup> (<sup>f</sup>) suggests that LAI (CO<sub>2</sub> concentration) is not measured at this site and the GLASS LAI product (CO<sub>2</sub> concentration at Mauna Loa) will be used instead.

**Table S3: Typical height for the 5 CSCS-based GRA groups**

| CSCS-based GRA group                 | Height (m) | Sources or references of the used EC sites                                                                                                                                                                                                                                                                                                                                                                                                                                                                                                                                    |
|--------------------------------------|------------|-------------------------------------------------------------------------------------------------------------------------------------------------------------------------------------------------------------------------------------------------------------------------------------------------------------------------------------------------------------------------------------------------------------------------------------------------------------------------------------------------------------------------------------------------------------------------------|
| Tundra and alpine steppe GRA         | 0.32       | CN-HaM <sup>a</sup> , GL-ZaH <sup>a</sup> , QHB <sup>b</sup> , and DK-ZaH <sup>a</sup>                                                                                                                                                                                                                                                                                                                                                                                                                                                                                        |
| Semi desert GRA                      | 0.39       | Shapotou <sup>c</sup> , CN-Sw2 <sup>a</sup> , Xiziwang Banner <sup>c</sup> , US-Cop <sup>a</sup> , AU-Ync <sup>a</sup> , US-SRG <sup>a</sup> , US-Aud <sup>d</sup> , and AU-Sam <sup>e</sup>                                                                                                                                                                                                                                                                                                                                                                                  |
| Savanna                              | 0.78       | US-Wkg <sup>d</sup> , AU-Emr <sup>a</sup> , AU-Stp <sup>a</sup> , AU-DaP <sup>a</sup>                                                                                                                                                                                                                                                                                                                                                                                                                                                                                         |
| Steppe GRA                           | 0.28       | US-FPe <sup>d</sup> , KBU <sup>b</sup> , AU-Rig <sup>a</sup> , US-AR1 <sup>d</sup> , US-AR2 <sup>d</sup> , US-Var <sup>d</sup> , PT-Mi2 <sup>a</sup>                                                                                                                                                                                                                                                                                                                                                                                                                          |
| Temperate zonal humid GRA            | 0.43       | Inner Mongolia <sup>c</sup> , Xilinhot <sup>c</sup> , CN-Du3 <sup>a</sup> , DK-Eng <sup>a</sup> , IT-MBo, CN-Du2 <sup>a</sup> , DK-Lva <sup>a</sup> , US-Bkg <sup>d</sup> , Duolun <sup>c</sup> , Hulun Buir <sup>c</sup>                                                                                                                                                                                                                                                                                                                                                     |
| Temperate zonal forest steppe GRA    | 0.52       | CN-Cng <sup>a</sup> , HU-Bug <sup>a</sup> , LSH <sup>b</sup> , YCS <sup>b</sup> , Ansai <sup>b</sup> , AT-Neu <sup>a</sup> , CN-Dan <sup>a</sup> , IT-Tor <sup>a</sup> , RU-Ha1 <sup>a</sup> , SE-Deg <sup>a</sup> , HBG <sup>b</sup> , Arou <sup>e</sup> , CH-Cha <sup>a</sup> , CH-Fru <sup>a</sup> , CH-Oe1 <sup>a</sup> , CZ-BK2 <sup>a</sup> , DE-RuR <sup>a</sup> , DE-Gri <sup>a</sup> , FR-Lq1 <sup>a</sup> , FR-Lq2 <sup>a</sup> , IT-Mala, ES-VDA <sup>a</sup> , IE-Dria, NL-Hor <sup>a</sup> , US-IB2 <sup>a</sup> , IT-Amp <sup>a</sup> , and NL-Ca1 <sup>a</sup> |
| Sub-tropical zonal forest steppe GRA | 0.46       | US-Arb <sup>d</sup> , US-Arc <sup>d</sup> , US-LWW <sup>d</sup> , AU-Sam <sup>a</sup> , US-Goo <sup>d</sup> , and HFK <sup>b</sup>                                                                                                                                                                                                                                                                                                                                                                                                                                            |
| Frigid desert GRA                    | 0.33       | Yin et al., (2019)                                                                                                                                                                                                                                                                                                                                                                                                                                                                                                                                                            |
| Warm desert GRA                      | 0.50       | White (1983), Suttie et al. (2005), Kadeba et al. (2015)                                                                                                                                                                                                                                                                                                                                                                                                                                                                                                                      |
| Tropical zonal forest steppe GRA     | 0.60       | Prakash et al., (2020)                                                                                                                                                                                                                                                                                                                                                                                                                                                                                                                                                        |

Note: <sup>a</sup>, <sup>b</sup>, <sup>c</sup> and <sup>d</sup> represent that the sites are from FLUXNET (<http://fluxnet.fluxdata.org/>), AsiaFlux (<http://asiaflux.net/>), ChinaFLUX (<http://www.chinaflux.org/>), AmeriFlux (<https://ameriflux.lbl.gov/>), HiWATER (<https://data.tpdc.ac.cn/zh-hans/special/heihe/>), and OzFlux (<https://data.ozflux.org.au/portal/home.jsp>), respectively.

**Table S4: Cropland height (Allen et al., 1998)**

| Cropland types | Height (m) | Cropland types    | Height (m) | Cropland types  | Height (m) |
|----------------|------------|-------------------|------------|-----------------|------------|
| Arabica coffee | 2.50       | Other fibre crops | 1.35       | Small millet    | 1.50       |
| Banana         | 3.50       | Oilpalm           | 8.00       | Sorghum         | 2.25       |
| Barley         | 1.00       | Other oil crops   | 0.55       | Soybean         | 0.75       |
| Bean           | 0.40       | Other pulses      | 0.80       | Sugarbeet       | 0.45       |
| Cassava        | 1.25       | Other roots       | 0.50       | Sugarcane       | 3.00       |
| Chickpea       | 0.40       | Pigeonpea         | 0.50       | Sunflower       | 2.00       |
| Coconut        | 8.00       | Plantain          | 5.00       | Sweet potato    | 0.40       |
| Cocoa          | 3.00       | Pearl millet      | 2.00       | Tea             | 1.75       |
| Cotton         | 1.35       | Potato            | 0.60       | Temperate fruit | 3.92       |
| Cowpea         | 0.40       | Rapeseed          | 0.60       | Tobacco         | 1.35       |
| Groundnut      | 0.40       | Robusta coffee    | 6.00       | Tropical fruit  | 0.90       |
| Lentil         | 0.50       | Rest of crops     | 0.98       | Vegetables      | 0.43       |
| Maize          | 1.75       | Rice              | 1.00       | Wheat           | 1.00       |
| Other cereals  | 1.00       | Sesameseed        | 1.00       | Yams            | 1.60       |

**Table S5:  $k_{ex}$ ,  $w$ ,  $z_{0g}$  and  $\alpha_m$  values for various LULC types**

| LULC types                | CRO   | FR    | GRA  | SHRB | Tundra | Barren land | Snow/Ice |
|---------------------------|-------|-------|------|------|--------|-------------|----------|
| $k_{ex}^a$ (unitless)     | 0.62  | 0.47  | 0.50 | 0.56 | 0.55   | 0           | 0        |
| $w_{max}^b$ (m)           | 0.01  | 0.034 | 0.01 | 0.01 | 0.01   | /           | /        |
| $z_{0g}^b$ (m)            | 0.005 | 0.02  | 0.01 | 0.02 | 0.01   | 0.001       | 0.001    |
| $\alpha_m^b$ (unitless)   | 0.20  | 0.17  | 0.23 | 0.18 | 0.23   | 0.15        | 0.70     |
| $\Delta g_{1,CO_2}^c$ (%) | 0.36  | 0.23  | 0.25 | 0.40 | 0.36   | /           | /        |

Note: <sup>a</sup> represents this parameter is from Zhang et al. (2014) and van der Kolk et al. (2016), while <sup>b</sup> indicates this parameter comes from Zhou et al. (2006). <sup>b</sup> indicates that this parameter is obtained from Morison and Gifford (1984), Field et al. (1995), Saxe et al. (1998), Neitsch et al. (2002), Eckhardt and Ulbrich (2003), and Wu et al. (2017).

**Table S6: The calibrated values of  $r_{smin}$  for each GLASS-GLC type**

| GLASS-GLC types | $r_{smin}$ (s/m)    |
|-----------------|---------------------|
| CRO             | 52.96               |
| FR              | 104.91              |
| GRA             | 115.94              |
| SHRB            | 115.56              |
| Tundra          | 80.00 <sup>a</sup>  |
| Barren land     | 120.00 <sup>a</sup> |
| Snow/Ice        | 0 <sup>a</sup>      |

Note: <sup>a</sup> represents that  $r_{smin}$  is from Zhou et al. (2006).



## References

- Allen, R., Pereira, L., Raes, D. and Smith, M.: Crop Evapotranspiration Guidelines for Computing Crop Water Requirements. FAO Irrigation and Drainage Paper 56. Rome: Food and Agriculture Organization of the United Nations, 1998.
- Brisson, N., Itier, B., L'Hotel, J. C. and Lorendeau, J. Y.: Parameterisation of the Shuttleworth-Wallace model to estimate daily maximum transpiration for use in crop models. *Ecological Modelling*, 107, 159–169, 1998.
- Choudhury, B. J. and Monteith, J. L.: A four-layer model for the heat budget of homogeneous land surfaces. *Quarterly Journal of the Royal Meteorological Society*, 114, 373–398, 1988.
- Dai, Y., Wei, N., Yuan, H., Zhang, S., Shangguan, W., Liu, S., Lu, X. and Xin, Y.: Evaluation of soil thermal conductivity schemes for use in land surface modelling. *Journal of Advances in Modeling Earth Systems*, 11(11), 3454–3473, 2019a.
- Dai, Y., Xin, Q., Wei, N., Zhang, Y., Shangguan, W., Yuan, H., Zhang, S., Liu, S. and Lu, X.: (2019b), A global high-resolution dataset of soil hydraulic and thermal properties for land surface modeling. *Journal of Advances in Modeling Earth Systems*, 11(9), 2996–3023, 2019b.
- Dalton, J.: Experimental essays on the constitution of mixed gases: on the force of steam or vapour from water or other liquids in different temperatures, both in a Torricelli vacuum and in air; on evaporation; and on expansion of gases by heat. *Memoirs, Literary, and Philosophical Society of Manchester*, 5, 536–602, 1802.
- Eckhardt, K. and Ulbrich, U.: Potential impacts of climate change on groundwater recharge and streamflow in a central European low mountain range. *Journal of Hydrology*, 284(1–4), 244–252, 2003.
- Federer, C. A., Vorosmarty, C. J. and Fekete, B.: Intercomparison of methods for potential evapotranspiration in regional or global water balance models. *Water Resources Research*, 32, 2315–2321, 1996.
- Field, C. B., Jackson, R. B. and Mooney, H. A.: Stomatal responses to increased CO<sub>2</sub>: implications from the plant to the global scale. *Plant, Cell & Environment*, 18(10), 1214–1225, 1995.
- Hargreaves, G. H. and Samani, Z. A.: Estimating potential evapotranspiration. *Journal of the Irrigation and Drainage Division, Proceedings of the American Society of Civils Engineers*, 108, 225–230, 1983.
- Kadeba, A., Nacoulma, B. M. I., Ouédraogo, A., Bachmann, Y., Thiombiano, A., Schmidt, M. and Boussim, I. J.: Land cover change and plants diversity in the Sahel: a case study from northern Burkina Faso. *Annals of Forest Research*, 58(1), 109–123, 2015.
- Monteith, J. L.: *Evaporation and environment*, Symposia of the society for experimental biology, Cambridge University Press, Cambridge, 1965.
- Monteith, J. L.: *Principles of Environmental Physics*. Edward Arnold, London, pp. 214, 1973.
- Morison, J. I. L. and Gifford, R. M.: Plant growth and water use with limited water supply in high CO<sub>2</sub> concentrations. I. Leaf area, water use and transpiration. *Functional Plant Biology*, 11(5), 361–374, 1984.

Neitsch, S. L., Arnold, J. G., Kiniry, J. R., Williams, J. R. and King, K. W.: Soil and Water Assessment Tool Theoretical Documentation, Version 2000. Soil and Water Research Laboratory and Blackland Research Center, Grassland, 2002.

Penman, H. L.: Natural evaporation from open water, bare soil and grass. Proceedings of the Royal Society of London. Series A: Mathematical and physical sciences, 1032, 120–145, 1948.

Prakash, V., Bera, T., Pradhan, S. and Acharya, S. K.: Potential of *Syngonanthus nitens* fiber as a reinforcement in epoxy composite and its mechanical characterization. Journal of the Indian Academy of Wood Science, 17, 73–81, 2020.

Reddy, S. J.: An empirical method for estimating sunshine from total cloud amount. Solar Energy, 15(4), 281–285, 1974.

Saxe, H., Ellsworth, D. and Heath, J.: Tree and forest functioning in an enriched CO<sub>2</sub> atmosphere. New Phytologist, 139(3), 395–436, 1998.

Shuttleworth, W. J.: Evaporation. In: Maidment, D. R. (Ed.), Handbook of Hydrology. McGraw-Hill, New York, pp. 4.1–4.53, 1993.

Shuttleworth, W. J. and Wallace, J. S.: Evaporation from sparse crops – an energy combination theory. Quarterly Journal of the Royal Meteorological Society, 111, 839–855, 1985.

Shuttleworth, W. J. and Gurney, R. J.: The theoretical relationship between foliage temperature and canopy resistance in sparse crops. Quarterly Journal of the Royal Meteorological Society, 116, 497–519, 1990.

Suttie, J. M., Reynolds, S. G. and Batello, C.: Grasslands of the World. Plant Production and Protection Series No. 34. Rome: Food and Agriculture Organization of the United Nations, 2005.

Thorntwaite, C. W.: An approach toward a rational classification of climate. Geographical Review, 38, 55–94, 1948.

Turc, L.: Estimation of irrigation water requirements, potential evapotranspiration: a simple climatic formula evolved up to date. Annales Agronomiques, 12, 13–49, 1961.

Uchijima, Z.: Maize and rice. In: Monteith, J. L. (Ed.), Vegetation and the Atmosphere, vol. 2. Academic Press, New York, pp. 33–64, 1976.

van der Kolk, H. -J., Heijmans, M. M. P. D., van Huissteden, J., Pullens, J. W. M. and Berendse, F.: Potential Arctic tundra vegetation shifts in response to changing temperature, precipitation and permafrost thaw. Biogeosciences, 13, 6229–6245, 2016.

Villagarcía, L., Were, A., García, M. and Domingo, F.: Sensitivity of a clumped model of evapotranspiration to surface resistance parameterizations: Application in a semi-arid environment. Agricultural and Forest Meteorology, 150, 1065–1078, 2010.

White, F.: The vegetation of Africa. Paris: UNESCO, 1983

Wu, L., Min, L. L., Shen, Y. J., Zhou, X. X. and Liu, F. G.: Simulation of maize evapotranspiration at different growth stages using revised dual-layered model in arid Northwest China. Chinese Journal of Eco-Agriculture, 25(5), 634–646, 2017. (in Chinese with English Abstract)

Yin, J., Feng, Q., Liang, T., Meng, B., Yang, S., Gao, J., Ge, J., Hou, M., Liu, J., Wang, W., Yu, H. and Liu, B: Estimation of grassland height based on the random forest algorithm and remote sensing in the Tibetan Plateau. *IEEE Journal of Selected Topics in Applied Earth Observations and Remote Sensing*, 13, 178–186, 2019.

Zhang, B., Kang, S., Li, F. and Zhang, L.: Comparison of three evapotranspiration models to Bowen ratio-energy balance method for a vineyard in an arid desert region of northwest China. *Agricultural and Forest Meteorology*, 148(10), 1629–1640, 2008.

Zhang, L., Hu, Z., Fan, J., Zhou, D. and Tang, F.: A meta-analysis of the canopy light extinction coefficient in terrestrial ecosystems. *Frontiers of Earth Science*, 8, 599–609.

Zhou, M. C., Ishidaira, H., Hapuarachchi, H. P., Magome, J., Kiem, A. S. and Takeuchi, K.: Estimating potential evapotranspiration using Shuttleworth-Wallace model and NOAA-AVHRR NDVI data to feed a distributed hydrological model over the Mekong River basin. *Journal of Hydrology*, 327, 151–173, 2006.
